# Supplementary material for: SARS-CoV-2 subgenomic RNA kinetics in longitudinal clinical samples
Source: bioRxiv or medRxiv preprint supplement (doi:10.1101/2021.04.26.21256131), 2021-04-29
Supplement: Supplementary file [file media-1.pdf]

Verma et al. : SARS-CoV-2 subgenomic RNA kinetics in longitudinal clinical samples

Supplementary table 1: qPCR results for Remdesivir and DMSO treated cells infected with SARS-CoV-2

| Sample ID                    | Sample type | N-gene Ct | N-gene copies | sgRNA N1 Ct | sgRNA N1 copies | 18s rRNA Ct |
|------------------------------|-------------|-----------|---------------|-------------|-----------------|-------------|
| 1hpi_duplicate_1             | cell        | 24.8      | 5.20E+04      | 26.6        | 2.21E+03        | 11.6        |
| 1hpi_duplicate_1             | cell        | 24.7      | 5.66E+04      | 26.6        | 2.21E+03        | 11.3        |
| 1hpi_duplicate_2             | cell        | 26        | 2.68E+04      | 27.9        | 8.54E+02        | 13.2        |
| 1hpi_duplicate_2             | cell        | 25.9      | 2.72E+04      | 28.1        | 7.18E+02        | 13.2        |
| 24hpi_duplicate_1            | cell        | 11.4      | 1.05E+08      | 10.9        | 2.85E+08        | 7.1         |
| 24hpi_duplicate_1            | cell        | 11.5      | 1.02E+08      | 11          | 2.66E+08        | 6.9         |
| 24hpi_duplicate_2            | cell        | 12.1      | 7.11E+07      | 11.4        | 1.93E+08        | 7           |
| 24hpi_duplicate_2            | cell        | 12.2      | 6.78E+07      | 11.6        | 1.68E+08        | 7.3         |
| 48hpi-DMSO_duplicate_1       | cell        | 9.8       | 2.68E+08      | 10.1        | 5.10E+08        | 8           |
| 48hpi-DMSO_duplicate_1       | cell        | 9.9       | 2.55E+08      | 10.4        | 4.12E+08        | 7.8         |
| 48hpi-DMSO_duplicate_2       | cell        | 9.3       | 3.49E+08      | 9.7         | 7.11E+08        | 7.1         |
| 48hpi-DMSO_duplicate_2       | cell        | 9.4       | 3.42E+08      | 9.7         | 6.91E+08        | 7.1         |
| 48hpi-Remdesivir_duplicate_1 | cell        | 14.2      | 2.20E+07      | 14.4        | 2.11E+07        | 8.1         |
| 48hpi-Remdesivir_duplicate_1 | cell        | 14.1      | 2.27E+07      | 14.5        | 1.95E+07        | 8.1         |
| 48hpi-Remdesivir_duplicate_2 | cell        | 14.5      | 1.87E+07      | 14.5        | 1.86E+07        | 6.9         |
| 48hpi-Remdesivir_duplicate_2 | cell        | 14.4      | 1.94E+07      | 14.6        | 1.75E+07        | 7.1         |
| 72hpi-DMSO_duplicate_1       | cell        | 11.8      | 8.71E+07      | 11.7        | 1.56E+08        | 8.5         |
| 72hpi-DMSO_duplicate_1       | cell        | 11.6      | 9.30E+07      | 11.7        | 1.57E+08        | 8.4         |
| 72hpi-DMSO_duplicate_2       | cell        | 10.7      | 1.63E+08      | 10.7        | 3.24E+08        | 7.7         |
| 72hpi-DMSO_duplicate_2       | cell        | 10.6      | 1.70E+08      | 10.8        | 2.99E+08        | 7.9         |
| 72hpi-Remdesivir_duplicate_1 | cell        | 15.9      | 8.04E+06      | 15.9        | 6.56E+06        | 6.4         |
| 72hpi-Remdesivir_duplicate_1 | cell        | 15.8      | 8.52E+06      | 16          | 6.40E+06        | 6.5         |
| 72hpi-Remdesivir_duplicate_2 | cell        | 17.5      | 3.24E+06      | 17.7        | 1.79E+06        | 8.3         |
| 72hpi-Remdesivir_duplicate_2 | cell        | 17.4      | 3.47E+06      | 17.5        | 2.03E+06        | 8.3         |
| 96hpi-DMSO_duplicate_1       | cell        | 13.4      | 3.36E+07      | 13.7        | 3.48E+07        | 9           |
| 96hpi-DMSO_duplicate_1       | cell        | 13.5      | 3.19E+07      | 13.7        | 3.46E+07        | 9           |
| 96hpi-DMSO_duplicate_2       | cell        | 13.7      | 2.95E+07      | 13.8        | 3.32E+07        | 9.2         |
| 96hpi-DMSO_duplicate_2       | cell        | 13.6      | 3.02E+07      | 13.7        | 3.40E+07        | 9.2         |
| 96hpi-Remdesivir_duplicate_1 | cell        | 17        | 4.47E+06      | 18.3        | 1.09E+06        | 6.6         |
| 96hpi-Remdesivir_duplicate_1 | cell        | 17        | 4.46E+06      | 18.1        | 1.32E+06        | 6.5         |
| 96hpi-Remdesivir_duplicate_2 | cell        | 19        | 1.38E+06      | 20.5        | 2.13E+05        | 7.8         |
| 96hpi-Remdesivir_duplicate_2 | cell        | 18.9      | 1.46E+06      | 20.5        | 2.23E+05        | 7.9         |
| 1hpi_duplicate_1             | Supernatant | 25.4      | 3.63E+04      | 27.5        | 1.10E+03        | 20.7        |
| 1hpi_duplicate_1             | Supernatant | 25.4      | 3.71E+04      | 27.5        | 1.14E+03        | 20.7        |
| 1hpi_duplicate_2             | Supernatant | 23.1      | 1.39E+05      | 24          | 1.59E+04        | 17.6        |
| 1hpi_duplicate_2             | Supernatant | 23.4      | 1.18E+05      | 23.9        | 1.67E+04        | 17.7        |
| 24hpi_duplicate_1            | Supernatant | 22.7      | 1.77E+05      | 25.9        | 3.88E+03        | 21.1        |
| 24hpi_duplicate_1            | Supernatant | 22.6      | 1.79E+05      | 25.8        | 3.99E+03        | 21.1        |
| 24hpi_duplicate_2            | Supernatant | 21.2      | 3.97E+05      | 22.5        | 4.77E+04        | 19.8        |
| 24hpi_duplicate_2            | Supernatant | 21.2      | 3.97E+05      | 22.5        | 4.74E+04        | 19.9        |
| 48hpi-DMSO_duplicate_1       | Supernatant | 14.8      | 1.58E+07      | 16.5        | 4.39E+06        | 13.4        |
| 48hpi-DMSO_duplicate_1       | Supernatant | 14.7      | 1.63E+07      | 16.4        | 4.53E+06        | 13.4        |

|                              |             |      |          |      |          |      |
|------------------------------|-------------|------|----------|------|----------|------|
| 48hpi-DMSO_duplicate_2       | Supernatant | 14.6 | 1.76E+07 | 16.3 | 4.90E+06 | 13.3 |
| 48hpi-DMSO_duplicate_2       | Supernatant | 14.6 | 1.70E+07 | 16.2 | 5.25E+06 | 13.4 |
| 48hpi-Remdesivir_duplicate_1 | Supernatant | 18.8 | 1.59E+06 | 22.1 | 6.61E+04 | 16.8 |
| 48hpi-Remdesivir_duplicate_1 | Supernatant | 18.9 | 1.51E+06 | 22.1 | 6.33E+04 | 16.7 |
| 48hpi-Remdesivir_duplicate_2 | Supernatant | 19.3 | 1.22E+06 | 22.7 | 4.05E+04 | 17.2 |
| 48hpi-Remdesivir_duplicate_2 | Supernatant | 19.2 | 1.25E+06 | 22.7 | 4.09E+04 | 17.3 |
| 72hpi-DMSO_duplicate_1       | Supernatant | 14.9 | 1.48E+07 | 17.4 | 2.27E+06 | 14.6 |
| 72hpi-DMSO_duplicate_1       | Supernatant | 14.9 | 1.45E+07 | 17.4 | 2.26E+06 | 14.6 |
| 72hpi-DMSO_duplicate_2       | Supernatant | 15.1 | 1.34E+07 | 17.3 | 2.37E+06 | 14.5 |
| 72hpi-DMSO_duplicate_2       | Supernatant | 15   | 1.38E+07 | 17.4 | 2.25E+06 | 14.5 |
| 72hpi-Remdesivir_duplicate_1 | Supernatant | 17.5 | 3.33E+06 | 19.6 | 4.10E+05 | 15   |
| 72hpi-Remdesivir_duplicate_1 | Supernatant | 17.7 | 3.02E+06 | 19.6 | 4.17E+05 | 14.9 |
| 72hpi-Remdesivir_duplicate_2 | Supernatant | 18.3 | 2.06E+06 | 20.7 | 1.81E+05 | 15.7 |
| 72hpi-Remdesivir_duplicate_2 | Supernatant | 18.5 | 1.86E+06 | 20.7 | 1.84E+05 | 15.7 |
| 96hpi-DMSO_duplicate_1       | Supernatant | 13.6 | 2.99E+07 | 15   | 1.36E+07 | 13.4 |
| 96hpi-DMSO_duplicate_1       | Supernatant | 13.7 | 2.91E+07 | 14.8 | 1.56E+07 | 13.4 |
| 96hpi-DMSO_duplicate_2       | Supernatant | 14.4 | 1.91E+07 | 15.5 | 9.05E+06 | 14   |
| 96hpi-DMSO_duplicate_2       | Supernatant | 14.4 | 1.97E+07 | 15.6 | 8.75E+06 | 14   |
| 96hpi-Remdesivir_duplicate_1 | Supernatant | 17.1 | 4.07E+06 | 19.7 | 3.88E+05 | 13.3 |
| 96hpi-Remdesivir_duplicate_1 | Supernatant | 17.3 | 3.77E+06 | 19.7 | 3.89E+05 | 13.3 |
| 96hpi-Remdesivir_duplicate_2 | Supernatant | 18   | 2.47E+06 | 20.4 | 2.27E+05 | 13.9 |
| 96hpi-Remdesivir_duplicate_2 | Supernatant | 18   | 2.47E+06 | 20.4 | 2.30E+05 | 14.1 |
